# Supplementary material for: Elevated Blood Glucose Levels as a Primary Risk Factor for the Severity of COVID-19
Source: bioRxiv or medRxiv preprint supplement (doi:10.1101/2021.04.29.21256294), 2021-05-01
Supplement: Supplementary file [file media-1.pdf]

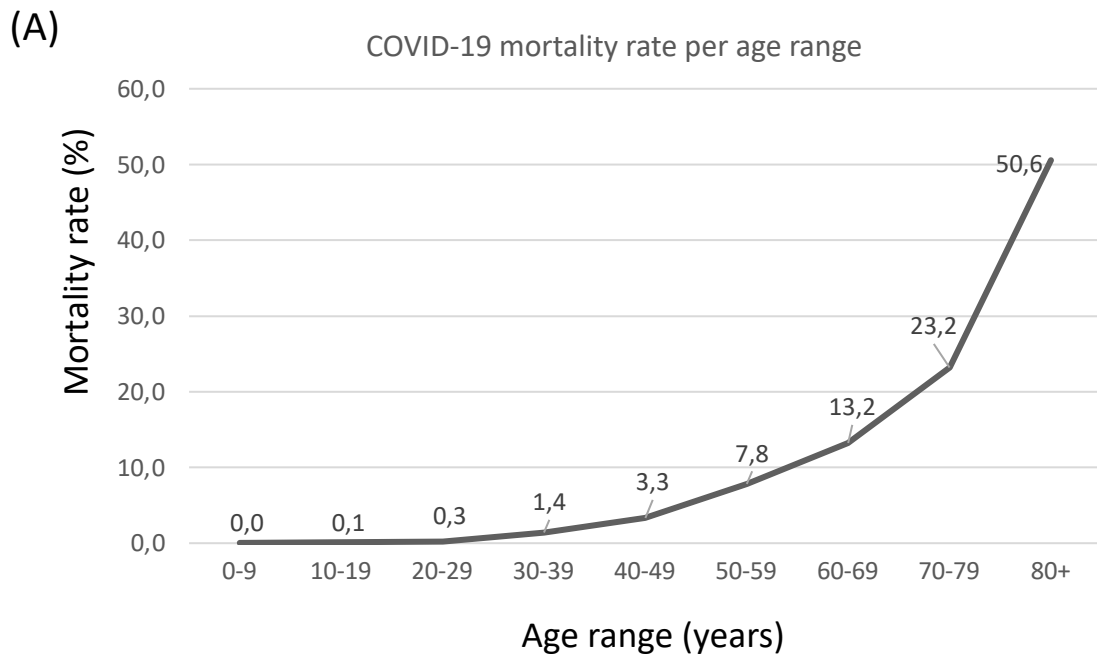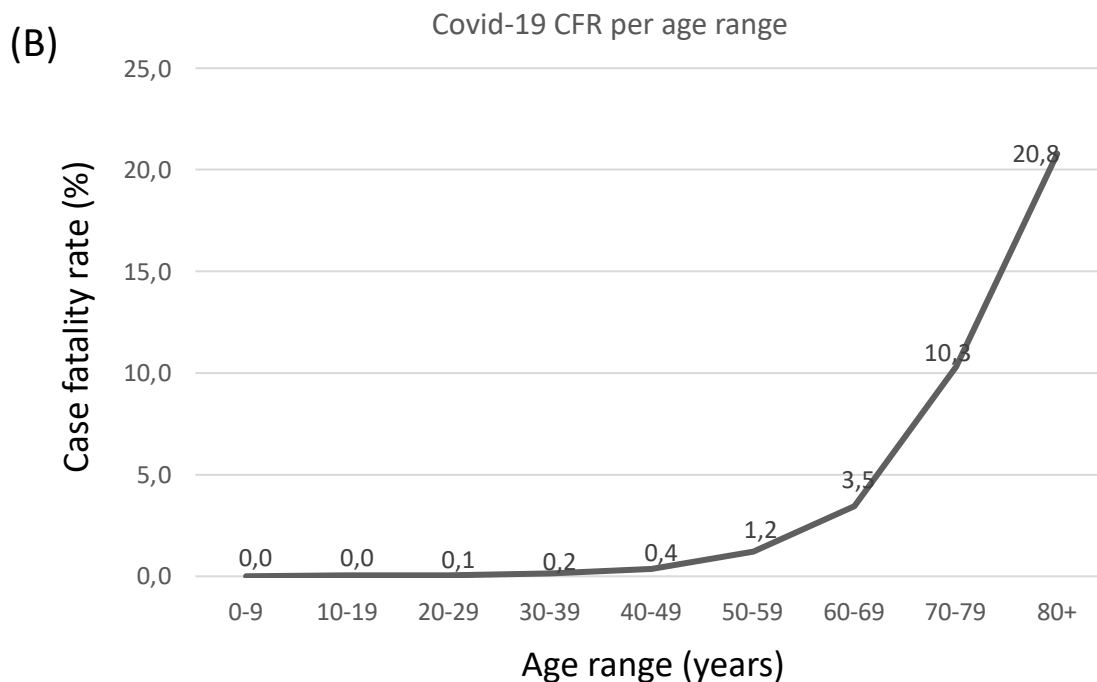

Supplementary Figure 1: (A) Average COVID-19 mortality rate per age range (i.e the percentage of COVID-19 deaths per age range among the total number of COVID-19 deaths). (B) Average COVID-19 case fatality rate (CFR) per age range (i.e the percentage of COVID-19 deaths among the COVID-19 positive cases per age range). Data source are reported in Supplementary Tables 1A and B respectively.

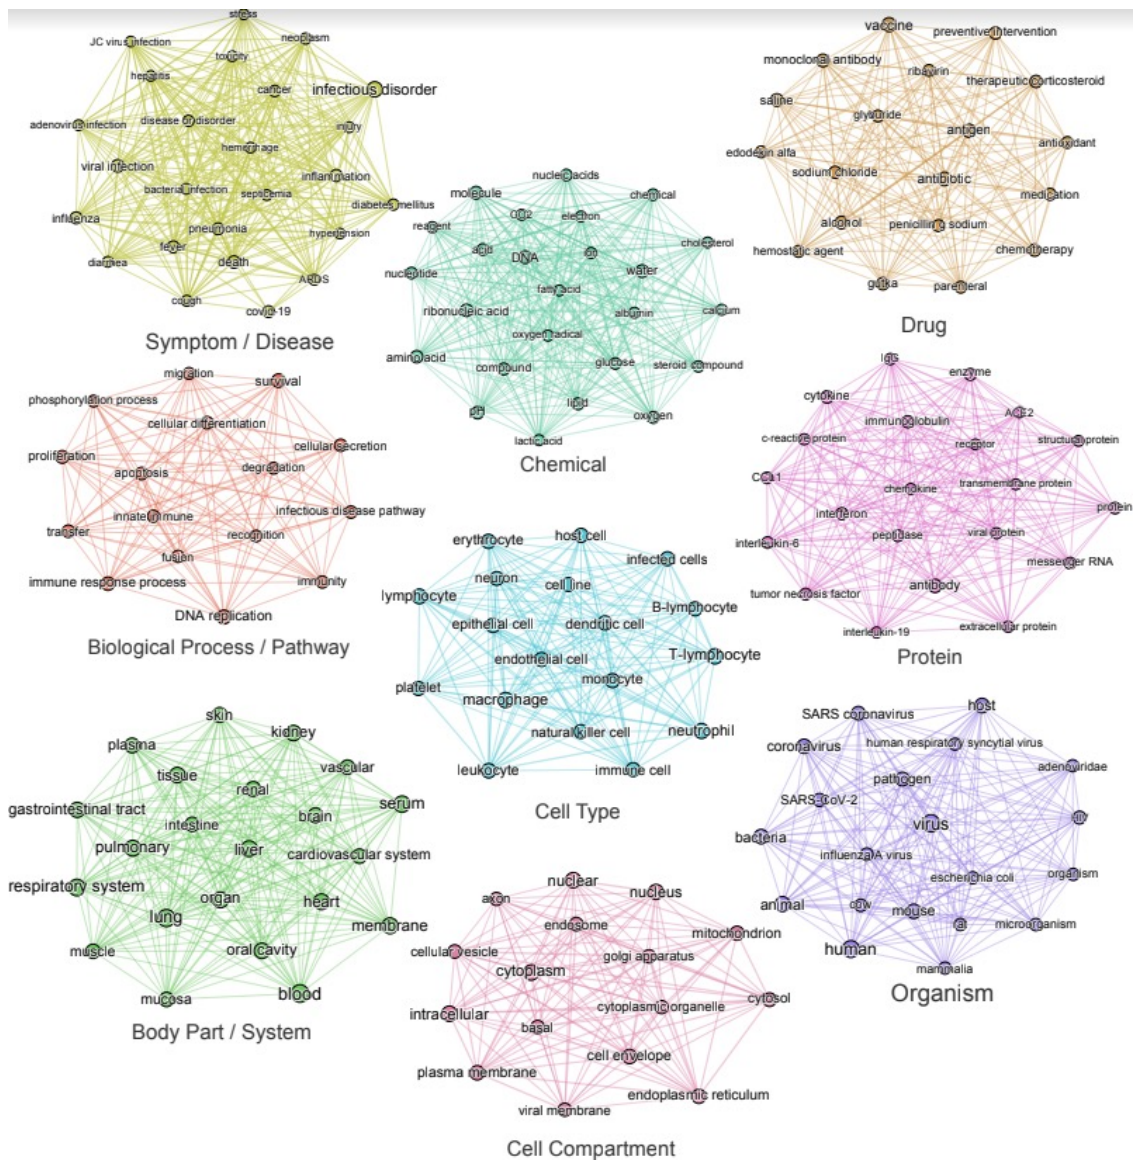

Supplementary Figure 2: Co-mention network overview with zoom on single-entity type subnetworks. Labeled subfigures represent samples of the most frequent entities for each respectively colored single-entity type subnetwork from Figure 2.

### Immune Response

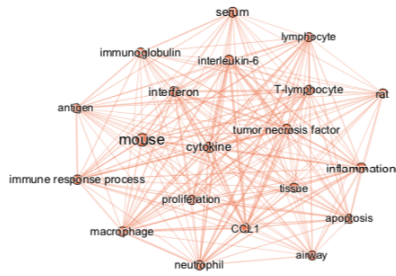

### Biology of Viruses

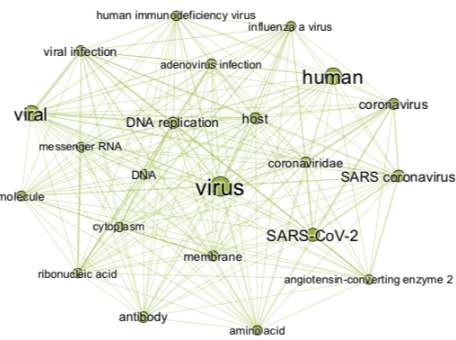

### Diseases and Symptoms

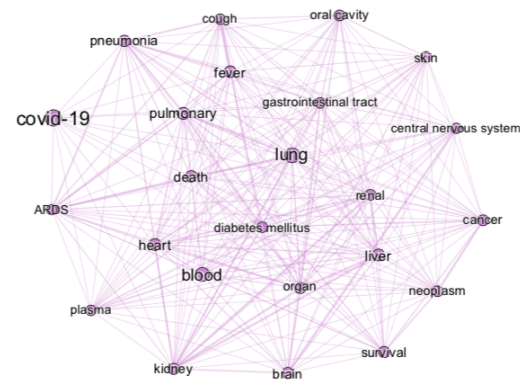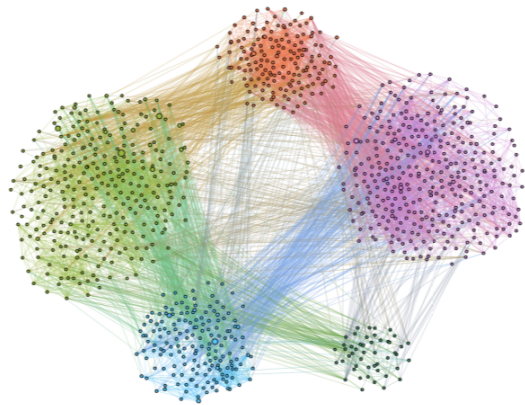

### Infectious Disorders

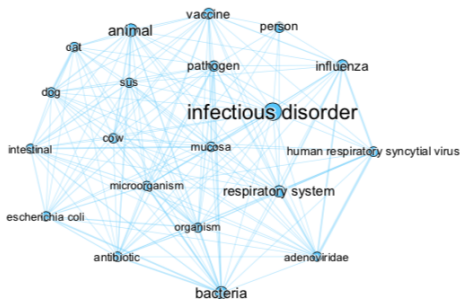

### Chemical Compounds

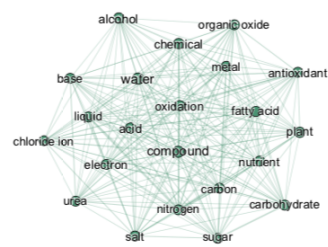

Supplementary Figure 3: Co-mention network communities overview. The figure in the center displays a sample of the knowledge graph containing ~1'000 nodes representing the most frequent entities and edges whose NPMI weight > 0.2. Node sizes are proportional to the weighted degree of nodes, node colors represent different communities detected using the Louvain algorithm and edge thickness is proportional to the NPMI weight of a given entity co-occurrence. Labeled subfigures represent samples of the most frequent entities for each respectively colored community.

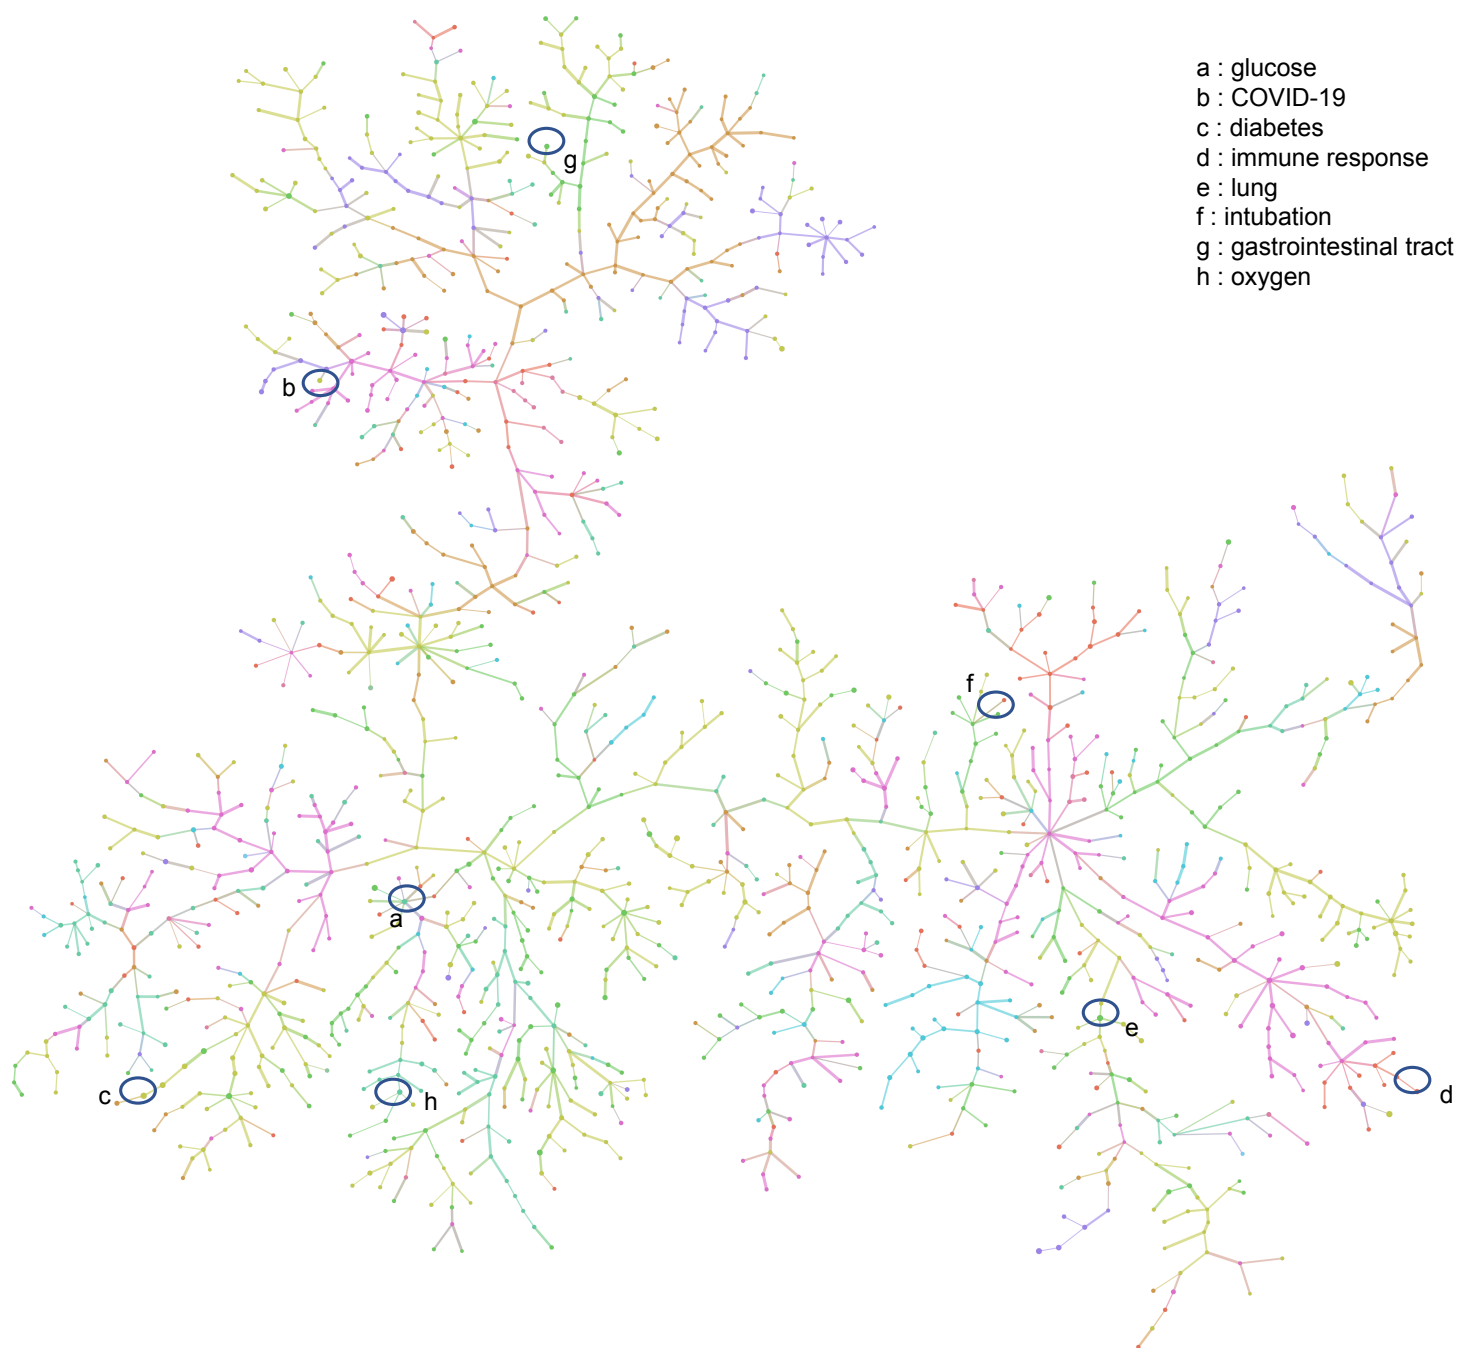

Supplementary Figure 4: Spanning-tree constructed from the 1,500-most frequent entities extracted from the 3,000-most relevant papers in the CORD-19v47 database, according to the query “Glucose is a risk factor for COVID-19”. Positions of few key entities are indicated. A high resolution pdf version is available (Figure S4 high res).

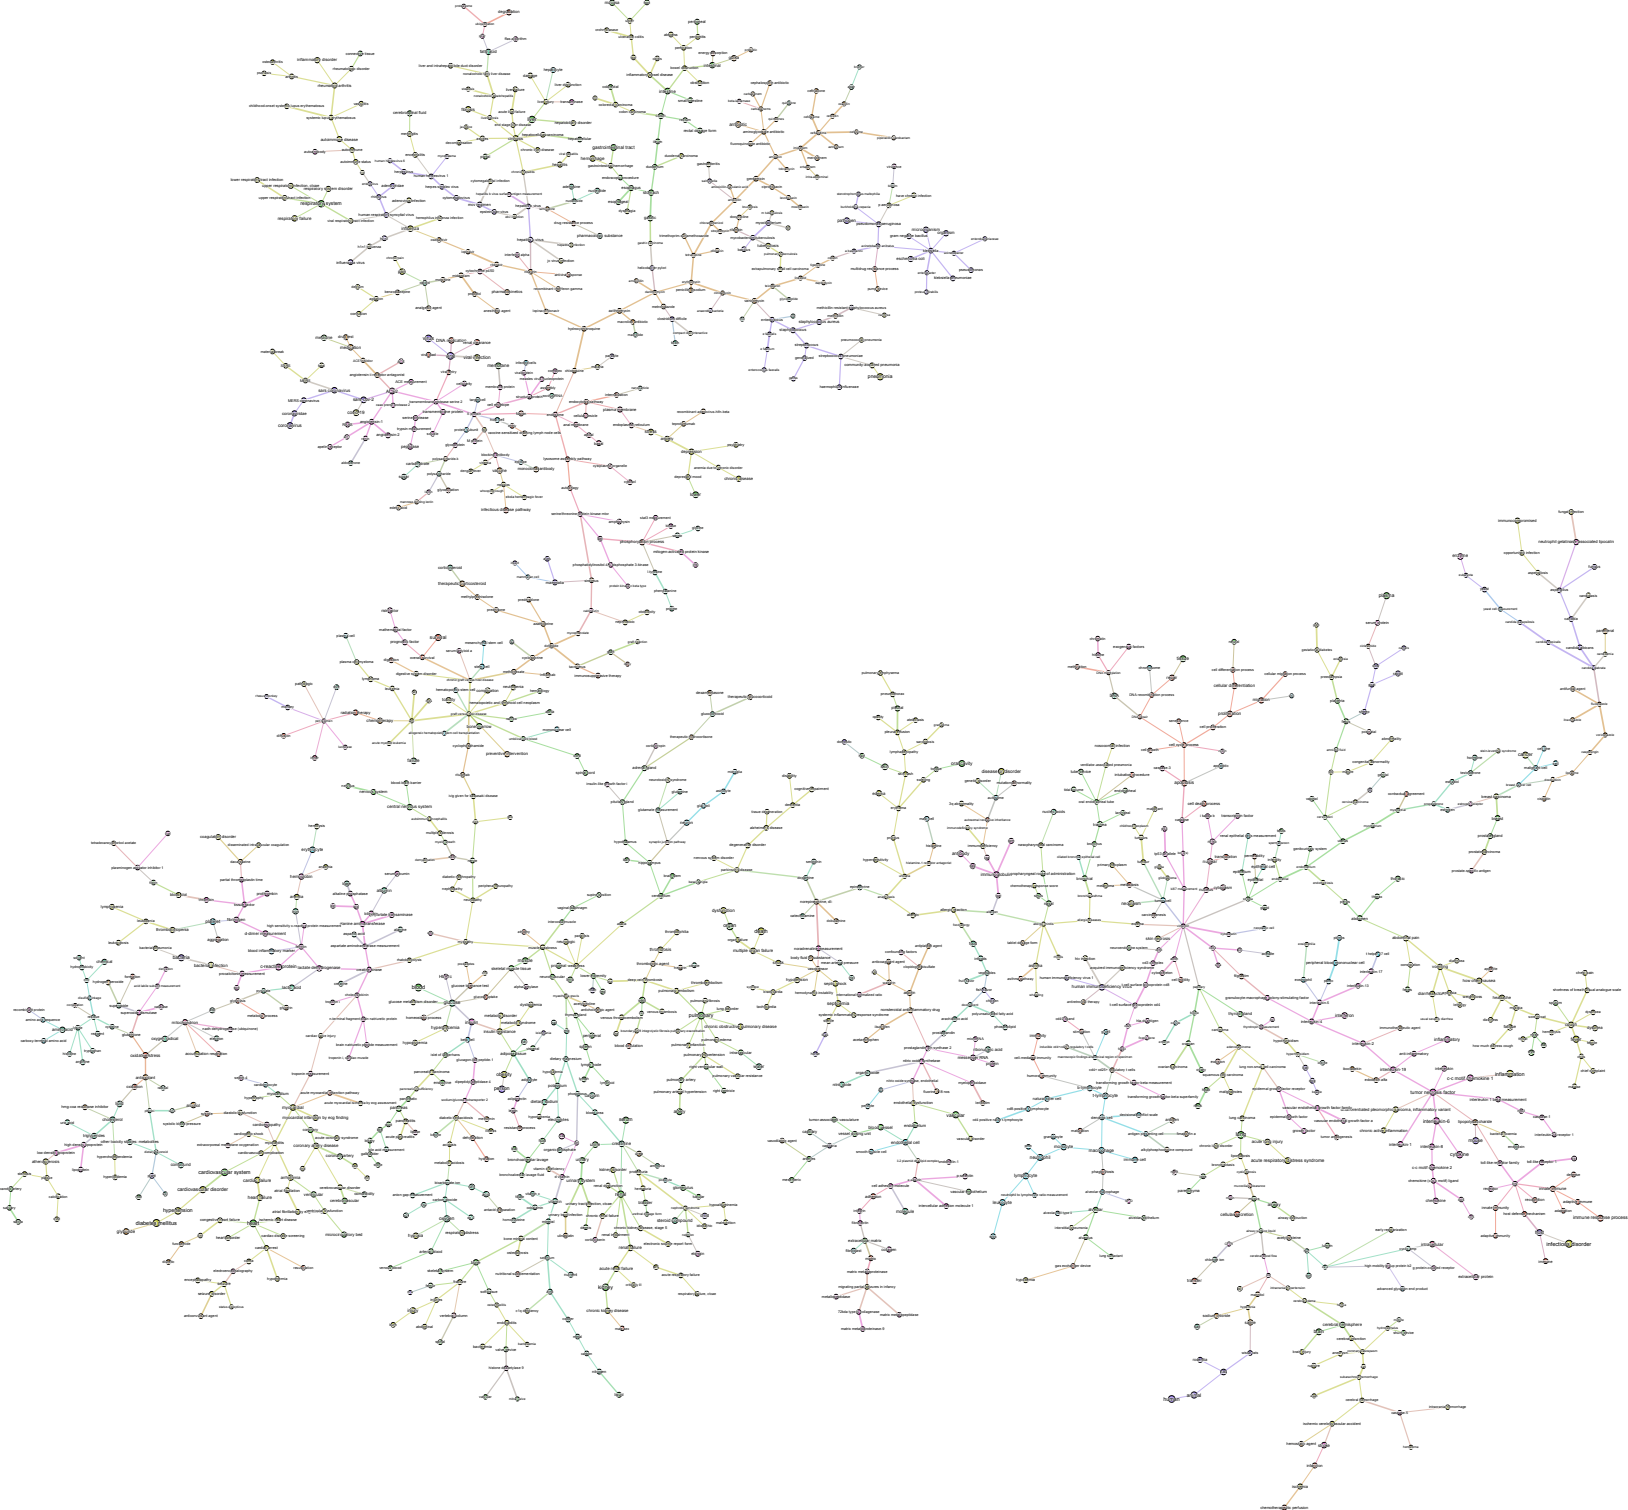

**A** Distribution of Comorbidities in COVID -19 deaths by age range

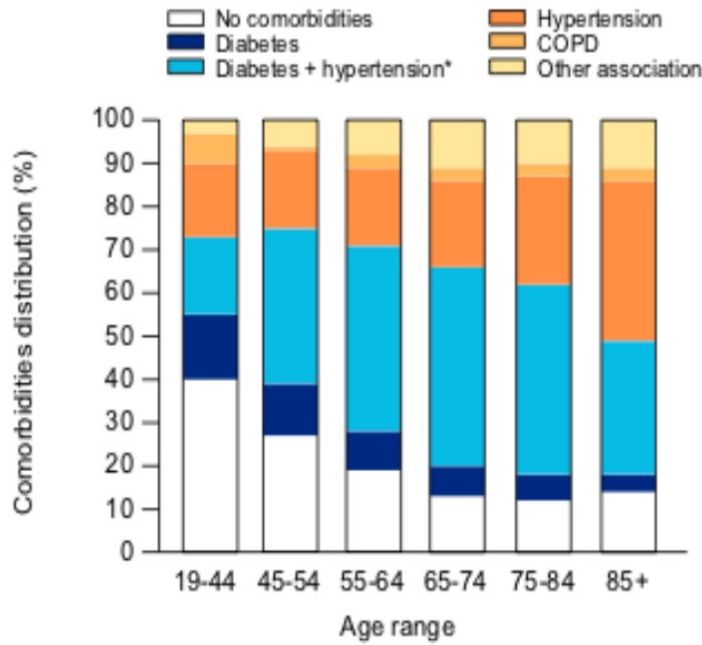

**B**

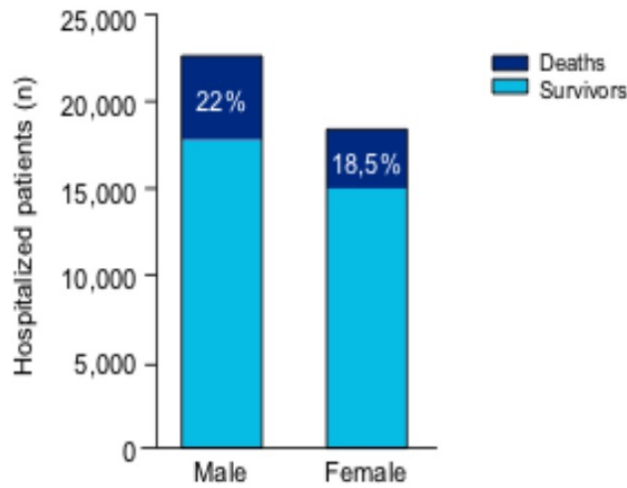

Supplementary Figure 5: A) Prevalence of comorbidities among COVID-19 related deaths. B) Distribution of death among total case of hospitalization according to gender. Data are from US populations as of April 30, 2020 and detailed in Supplementary Tables 3A and B respectively.

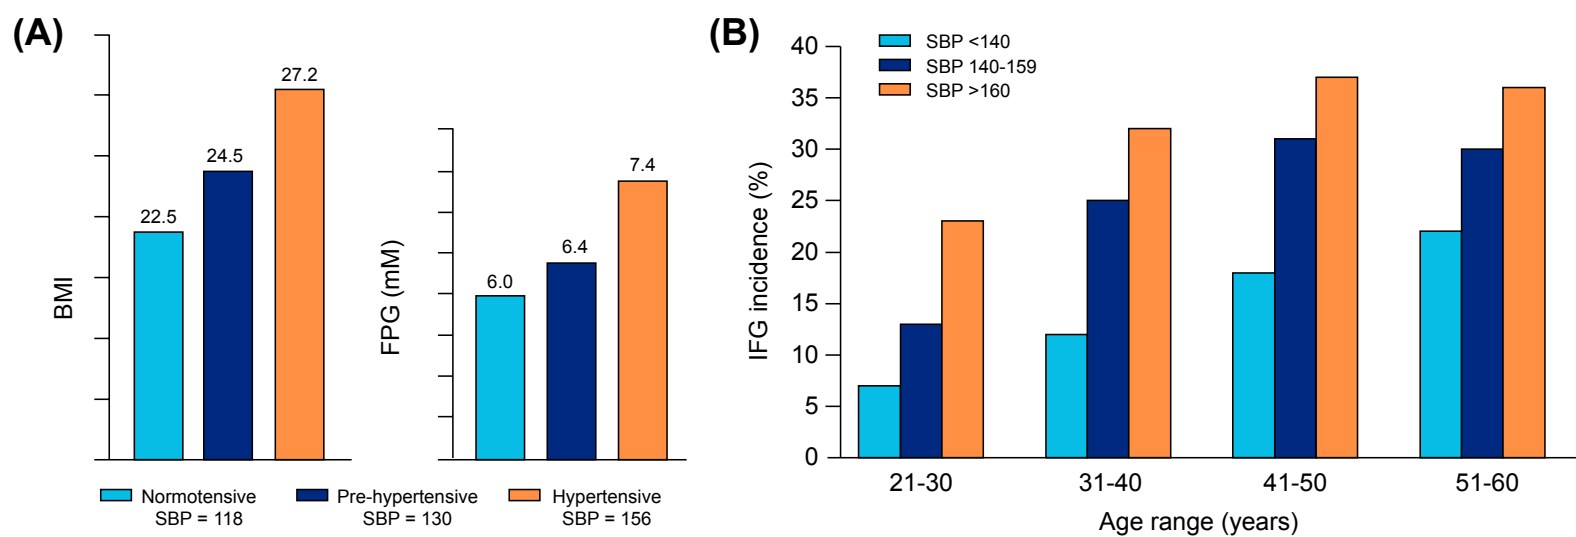

Supplementary Figure 6: Blood glucose in hypertension. (A) Correlation between hypertensive status according to SBP value (SBP=systolic blood pressure in mmHg), and BMI (top) or FPG (bottom). Adapted from Agrawal et al, 2017. (B) Prevalence of impaired fasting glucose (IFG) according to age range and SBP (mmHg). Adapted from Henry et al, 2002. (see Supplementary References)

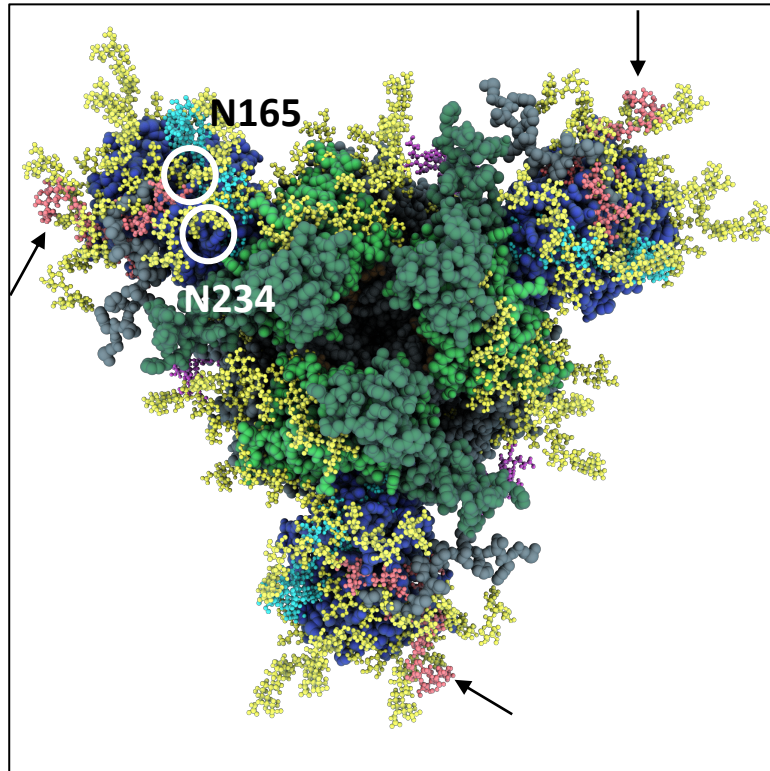

Supplementary Figure 7: Position of the potential new glycan site on the SARS-CoV-2 P.1 variant. The additional glycan-tree at N20 is colored in red and indicated with arrows on each S monomer of the spike. Position of N165 and N234 glycan-sites are circled on one single monomer.



A

| Age range    | South Korea   | Germany      | South Africa  | Sweden       | Italy         | Switzerland   | Japan         | Ukraine      | Global       |
|--------------|---------------|--------------|---------------|--------------|---------------|---------------|---------------|--------------|--------------|
| <b>0-9</b>   | 0.00          | 0.04         | 0.20          | 0.04         | 0.01          | 0.02          | 0.00          | 0.00         | <b>0.04</b>  |
| <b>10-19</b> | 0.00          | 0.02         | 0.30          | 0.01         | 0.01          | 0.00          | 0.00          | 0.80         | <b>0.14</b>  |
| <b>20-29</b> | 0.00          | 0.12         | 1.30          | 0.16         | 0.05          | 0.00          | 0.10          | 0.30         | <b>0.25</b>  |
| <b>30-39</b> | 0.40          | 0.24         | 6.10          | 0.30         | 0.22          | 0.13          | 0.31          | 3.60         | <b>1.41</b>  |
| <b>40-49</b> | 0.80          | 0.79         | 12.60         | 0.73         | 0.87          | 0.29          | 1.12          | 9.40         | <b>3.33</b>  |
| <b>50-59</b> | 4.59          | 3.08         | 24.40         | 2.41         | 3.40          | 1.58          | 3.26          | 19.90        | <b>7.83</b>  |
| <b>60-69</b> | 11.98         | 8.47         | 26.20         | 6.44         | 9.76          | 5.98          | 9.31          | 27.70        | <b>13.23</b> |
| <b>70-79</b> | 31.74         | 20.91        | 17.70         | 20.94        | 25.25         | 20.32         | 26.29         | 22.40        | <b>23.19</b> |
| <b>80+</b>   | 50.50         | 66.29        | 11.30         | 68.93        | 60.43         | 71.69         | 59.61         | 15.80        | <b>50.57</b> |
| <b>total</b> | <b>100.01</b> | <b>99.96</b> | <b>100.10</b> | <b>99.96</b> | <b>100.00</b> | <b>100.01</b> | <b>100.00</b> | <b>99.90</b> | <b>99.99</b> |

B

| Age range    | South Korea | China | Spain | Italy | Switzerland | Poland | Global       |
|--------------|-------------|-------|-------|-------|-------------|--------|--------------|
| <b>0-9</b>   | 0.00        | 0.00  | 0.01  | 0.00  | 0.00        | 0.00   | <b>0.00</b>  |
| <b>10-19</b> | 0.00        | 0.20  | 0.02  | 0.00  | 0.00        | 0.05   | <b>0.05</b>  |
| <b>20-29</b> | 0.00        | 0.20  | 0.12  | 0.00  | 0.00        | 0.00   | <b>0.05</b>  |
| <b>30-39</b> | 0.05        | 0.20  | 0.32  | 0.10  | 0.12        | 0.15   | <b>0.16</b>  |
| <b>40-49</b> | 0.10        | 0.40  | 1.06  | 0.20  | 0.08        | 0.30   | <b>0.36</b>  |
| <b>50-59</b> | 0.42        | 1.30  | 3.22  | 0.60  | 0.65        | 1.00   | <b>1.20</b>  |
| <b>60-69</b> | 1.27        | 3.60  | 5.00  | 3.00  | 3.35        | 4.50   | <b>3.45</b>  |
| <b>70-79</b> | 6.68        | 8.00  | 14.30 | 10.20 | 11.59       | 11.20  | <b>10.33</b> |
| <b>80+</b>   | 19.45       | 14.80 | 21.10 | 20.90 | 28.45       | 20.05  | <b>20.79</b> |

**Supplementary Tables 1 (Related to Supplementary Figures 1): A)** COVID-19 mortality rate per age range as of June 2020 in eight different countries. Global rates are plotted in Supplementary Figure 1A. **B)** COVID-19 case fatality rate (CFR) per age range as of June 2020 in six different countries. Global rates are plotted in Supplementary Figure 1B. References are listed in Supplementary References.

A

| Rank | Entity                     | Frequency | Entity type                  | Rank | Entity                            | Frequency | Entity type                  |
|------|----------------------------|-----------|------------------------------|------|-----------------------------------|-----------|------------------------------|
| 1    | COVID-19                   | 110,145   | Symptom / Disease            | 51   | amino acid                        | 14,227    | Chemical                     |
| 2    | virus                      | 75,012    | Organism                     | 52   | pH                                | 14,107    | Chemical                     |
| 3    | infectious disorder        | 73,574    | Symptom / Disease            | 53   | gastrointestinal tract            | 13,510    | Organ / System               |
| 4    | coronavirus                | 67,945    | Organism                     | 54   | immunoglobulin                    | 13,198    | Protein                      |
| 5    | human                      | 61,816    | Organism                     | 55   | antibiotic                        | 13,034    | Drug                         |
| 6    | viral                      | 52,801    | Organism                     | 56   | outbreak                          | 12,766    | Symptom / Disease            |
| 7    | SARS-COV-2                 | 49,386    | Organism                     | 57   | cow                               | 12,656    | Organism                     |
| 8    | SARS coronavirus           | 41,463    | Organism                     | 58   | transfer                          | 12,625    | Biological Process / Pathway |
| 9    | blood                      | 33,970    | Organ / System               | 59   | tissue                            | 12,542    | Organ / System               |
| 10   | person                     | 33,893    | Organism                     | 60   | nucleic acids                     | 12,530    | Chemical                     |
| 11   | coronaviridae              | 32,976    | Organism                     | 61   | ARDS                              | 12,392    | Symptom / Disease            |
| 12   | animal                     | 31,998    | Organism                     | 62   | brain                             | 12,307    | Organ / System               |
| 13   | lung                       | 31,752    | Organ / System               | 63   | cardiovascular system             | 11,864    | Organ / System               |
| 14   | respiratory system         | 31,221    | Organ / System               | 64   | interferon                        | 11,687    | Protein                      |
| 15   | death                      | 31,114    | Symptom / Disease            | 65   | skin                              | 11,686    | Organ / System               |
| 16   | host                       | 27,219    | Organism                     | 66   | renal                             | 11,630    | Organ / System               |
| 17   | bacteria                   | 26,082    | Organism                     | 67   | human respiratory syncytial virus | 11,356    | Organism                     |
| 18   | influenza                  | 26,000    | Symptom / Disease            | 68   | T-lymphocyte                      | 11,189    | Cell Type                    |
| 19   | antibody                   | 24,447    | Protein                      | 69   | plasma                            | 11,132    | Organ / System               |
| 20   | fever                      | 24,295    | Symptom / Disease            | 70   | MERS coronavirus                  | 11,063    | Organism                     |
| 21   | vaccine                    | 24,073    | Drug                         | 71   | disease or disorder               | 11,035    | Symptom / Disease            |
| 22   | pneumonia                  | 23,998    | Symptom / Disease            | 72   | compound                          | 10,907    | Chemical                     |
| 23   | viral infection            | 23,797    | Symptom / Disease            | 73   | nucleotide                        | 10,780    | Chemical                     |
| 24   | pathogen                   | 23,441    | Organism                     | 74   | neoplasm                          | 10,750    | Symptom / Disease            |
| 25   | mouse                      | 23,122    | Organism                     | 75   | enzyme                            | 10,567    | Protein                      |
| 26   | heart                      | 22,583    | Organ / System               | 76   | cytoplasm                         | 10,364    | Cell Compartment             |
| 27   | DNA replication            | 21,577    | Biological Process / Pathway | 77   | lower                             | 10,342    | Organ / System               |
| 28   | pulmonary                  | 21,261    | Organ / System               | 78   | nuclear                           | 10,305    | Cell Compartment             |
| 29   | serum                      | 20,300    | Organ / System               | 79   | antigen                           | 10,263    | Drug                         |
| 30   | water                      | 19,746    | Chemical                     | 80   | immunity                          | 10,236    | Biological Process / Pathway |
| 31   | survival                   | 18,915    | Biological Process / Pathway | 81   | peptidase                         | 10,156    | Protein                      |
| 32   | DNA                        | 16,948    | Chemical                     | 82   | adenoviridae                      | 10,148    | Organism                     |
| 33   | infectious disease pathway | 16,882    | Biological Process / Pathway | 83   | adenovirus infection              | 10,111    | Symptom / Disease            |

|    |                              |        |                              |     |                             |        |                              |
|----|------------------------------|--------|------------------------------|-----|-----------------------------|--------|------------------------------|
| 34 | membrane                     | 16,708 | Organ / System               | 84  | hypertension                | 1,094  | Symptom / Disease            |
| 35 | liver                        | 16,688 | Organ / System               | 85  | lymphocyte                  | 10,064 | Cell Type                    |
| 36 | inflammation                 | 16,554 | Symptom / Disease            | 86  | diarrhea                    | 10,039 | Symptom / Disease            |
| 37 | oral cavity                  | 16,522 | Organ / System               | 87  | macrophage                  | 10,028 | Cell Type                    |
| 38 | cough                        | 16518  | Symptom / Disease            | 88  | proliferation               | 10,006 | Biological Process / Pathway |
| 39 | ribonucleic acid             | 16,397 | Chemical                     | 89  | ACE2                        | 9,933  | Protein                      |
| 40 | cancer                       | 15,767 | Symptom / Disease            | 90  | neutrophil                  | 9,920  | Cell Type                    |
| 41 | human immunodeficiency virus | 15,733 | Organism                     | 91  | interleukin-6               | 9,883  | Protein                      |
| 42 | organ                        | 15,679 | Organ / System               | 92  | nasopharyngeal              | 9,851  | Symptom / Disease            |
| 43 | kidney                       | 15,600 | Organ / System               | 93  | microorganism               | 9,808  | Organism                     |
| 44 | cytokine                     | 15,584 | Protein                      | 94  | airway                      | 9,703  | Organ / System               |
| 45 | immune response process      | 15,014 | Biological Process / Pathway | 95  | child                       | 9,650  | Organism                     |
| 46 | diabetes mellitus            | 14,984 | Symptom / Disease            | 96  | mammalia                    | 9,643  | Organism                     |
| 47 | molecule                     | 14,846 | Chemical                     | 97  | messenger RNA               | 9,614  | Protein                      |
| 48 | influenza A virus            | 14,686 | Organism                     | 98  | eye                         | 9,588  | Organ / System               |
| 49 | SARS                         | 14,372 | Symptom / Disease            | 99  | respiratory system disorder | 9,528  | Symptom / Disease            |
| 50 | oxygen                       | 14,289 | Chemical                     | 100 | injury                      | 9,438  | Symptom / Disease            |

## B

| Rank | Entity        | Rank | Entity type |
|------|---------------|------|-------------|
| 1    | water         | 10   | nucleotide  |
| 2    | DNA           | 11   | viral RNA   |
| 3    | RNA           | 12   | chemical    |
| 4    | molecule      | 13   | lipid       |
| 5    | oxygen        | 14   | reagent     |
| 6    | amino acid    | 14   | acid        |
| 7    | pH            | 16   | CO2         |
| 8    | nucleic acids | 17   | glucose     |
| 9    | compound      | ...  |             |

**Supplementary Tables 2 (Related to Table 1): A)** Ranking of the 100 most frequently mentioned terms in the CORD-19v47 database following COVID-19-related entity types recognition. (i.e. ‘COVID-19’ is mentioned in 110,145 distinct papers). **B)** Ranking of top mentioned terms from the entity type “*chemical*” in the CORD-19v47 database.

Note that in order to filter out mentions of glucose as a chemical appearing in experimental procedures, we have excluded sections entitled 'Methods' and 'Materials and Methods' from our analysis.

A

| Age range                      | 0-18 | 19-44   | 45-54    | 55-64    | 65-74    | 75-84     | 85+      |
|--------------------------------|------|---------|----------|----------|----------|-----------|----------|
| Total death n                  | 0    | 241     | 468      | 1,181    | 2,010    | 2,356     | 2,087    |
| no comorbidities n (%)         | 0    | 97 (40) | 126 (27) | 225 (19) | 261 (13) | 283 (12)  | 292 (14) |
| Diabetes n (%)                 | 0    | 36 (15) | 56 (12)  | 106 (9)  | 141 (7)  | 141 (6)   | 84 (4)   |
| Diabetes + Hypertension* n (%) | 0    | 43 (18) | 169 (36) | 508 (43) | 925 (46) | 1036 (44) | 647 (31) |
| Hypertension n (%)             | 0    | 41 (17) | 84 (18)  | 213 (18) | 402 (20) | 589 (25)  | 772 (37) |
| COPD n (%)                     | 0    | 17 (7)  | 5 (1)    | 35 (3)   | 60 (3)   | 71 (3)    | 63 (3)   |
| Other combinations n (%)       | 0    | 7 (3)   | 28 (6)   | 94 (8)   | 221 (11) | 236 (10)  | 229 (11) |

B

|                     | Male        | Female        |
|---------------------|-------------|---------------|
| Total case (n)      | 22,566      | 18,441        |
| Total death (n) (%) | 4,937 (22%) | 3,406 (18,5%) |

**Supplementary Tables 3 (Related to Supplementary Figures 5).** (A) Prevalence of comorbidities among COVID-19 related deaths as plotted in Supplementary Figure 5A. (B) Distribution of death among total cases of hospitalization according to gender as plotted in Supplementary Figure 5B. Data from US populations as of April 30, 2020. Data source: <https://ehrn.org/prevalence-of-comorbidities-in-covid-19-related-hospitalizations-and-deaths/>

**A**

|                       | FPG (mM)    |            | 2h PPG (mM) |             | HbA1c (%)   |            |
|-----------------------|-------------|------------|-------------|-------------|-------------|------------|
|                       | Control     | T2DM       | Control     | T2DM        | Control     | T2DM       |
| Duraisamy et al, 2010 | 4.5         | 9.01       | 5.32        | 13.05       | 5.22        | 8.97       |
| Bhowmik et al, 2018   | 4.7         | 9.5        | 5.4         | 13.9        | 5.3         | 7.6        |
| Yang et al, 2014      | 5.26        | 9.79       | 5.45        | 14.53       | 4.23        | 8.19       |
| <b>Mean</b>           | <b>4.82</b> | <b>9.4</b> | <b>5.4</b>  | <b>13.8</b> | <b>4.92</b> | <b>8.3</b> |

**B**

|                      | Control     |          | Hypertensive |          |
|----------------------|-------------|----------|--------------|----------|
|                      | FPG mM      | <i>n</i> | FPG mM       | <i>n</i> |
| Mittal, 2014         | 4.6         | 50       | 5.47         | 70       |
| Tarray et al , 2014  | 4.92        | 50       | 5.31         | 50       |
| Heianza et al , 2015 | 5.24        | 8,486    | 5.44         | 1,098    |
| <b>Mean</b>          | <b>4.92</b> |          | <b>5.41</b>  |          |

**Supplementary Tables 4 (Related to Figures 9): (A)** Values of FPG, 2h-PPG and HbA1c in control (n=2,116) versus diabetic patients (n=439) according to values reported in 3 different studies. Mean values are plotted in Figure 9A. **(B)** Values of FPG in control (n=8,586) versus hypertensive patients (n=1,218) according to values reported in three different studies. Mean values are plotted in Figure 9B. References are listed in Supplementary References.

A

| Age   | FPG (mM)                       |                                     |                                     |                                 | Mean        |
|-------|--------------------------------|-------------------------------------|-------------------------------------|---------------------------------|-------------|
| <19   | 5.2                            | NA                                  | 4.9                                 | 4.78                            | <b>4.96</b> |
| 20-29 | 5.1                            | NA                                  | 5                                   | 4.83                            | <b>4.98</b> |
| 30-39 | 5.05                           | 4.44                                | 5.1                                 | 4.97                            | <b>4.89</b> |
| 40-49 | 5.5                            | 4.61                                | 5.15                                | 5.22                            | <b>5.12</b> |
| 50-59 | 5.7                            | 4.78                                | 5.2                                 | 5.44                            | <b>5.28</b> |
| 60-69 | 5.7                            | 5.06                                | 5.3                                 | 5.50                            | <b>5.39</b> |
| 70-79 | 5.71                           | 5.39                                | NA                                  | 5.56                            | <b>5.55</b> |
| 80-89 | 5.72                           | 5.72                                | NA                                  | 5.64                            | <b>5.69</b> |
| >90   | 5.72                           | 6.06                                | NA                                  | NA                              | <b>5.89</b> |
|       | Ko et al,<br>2006<br>(n=6,901) | Yashin et<br>al, 2009<br>(n= 5,128) | Yates and<br>Laing, 2002<br>(n=191) | Yi et al,<br>2017<br>(n>10,000) |             |

B

| Age   | FPG in male (mM)                    |                                 | Mean FPG male | FPG in female (mM)                 |                                 | Mean FPG female |
|-------|-------------------------------------|---------------------------------|---------------|------------------------------------|---------------------------------|-----------------|
| <19   | NA                                  | 4.78                            | <b>4.78</b>   | NA                                 | 4.78                            | <b>4.78</b>     |
| 20-29 | NA                                  | 4.89                            | <b>4.89</b>   | NA                                 | 4.78                            | <b>4.78</b>     |
| 30-39 | 4.44                                | 5.11                            | <b>4.78</b>   | 4.39                               | 4.89                            | <b>4.64</b>     |
| 40-49 | 4.58                                | 5.39                            | <b>4.99</b>   | 4.53                               | 5.03                            | <b>4.78</b>     |
| 50-59 | 4.78                                | 5.56                            | <b>5.17</b>   | 4.72                               | 5.22                            | <b>4.97</b>     |
| 60-69 | 5.17                                | 5.56                            | <b>5.36</b>   | 5.03                               | 5.42                            | <b>5.22</b>     |
| 70-79 | 5.67                                | 5.56                            | <b>5.61</b>   | 5.42                               | 5.56                            | <b>5.49</b>     |
| 80-89 | 5.78                                | 5.61                            | <b>5.69</b>   | 5.78                               | 5.67                            | <b>5.72</b>     |
| >90   | 6.11                                | NA                              | <b>6.11</b>   | 6.33                               | NA                              | <b>6.33</b>     |
|       | Yashin et al,<br>2009<br>(n= 2,336) | Yi et al,<br>2017<br>(n>10,000) |               | Yashin et al,<br>2009<br>(n=2,873) | Yi et al,<br>2017<br>(n>10,000) |                 |

C

| Age   | 2h PPG (mM)                      |                                 |                                |                                     | Mean        |
|-------|----------------------------------|---------------------------------|--------------------------------|-------------------------------------|-------------|
| 20-29 | 6.11                             | 7.22                            | 7.28                           | NA                                  | <b>6.87</b> |
| 30-39 | 6.22                             | 7.44                            | 7.61                           | 5.9                                 | <b>6.79</b> |
| 40-49 | 6.78                             | 7.67                            | 8.00                           | 6.2                                 | <b>7.16</b> |
| 50-59 | 7.22                             | 7.22                            | 8.39                           | 6.5                                 | <b>7.33</b> |
| 60-69 | 7.78                             | 8.44                            | 8.72                           | 7.1                                 | <b>8.01</b> |
| 70-79 | 7.78                             | 8.39                            | 9.61                           | 8                                   | <b>8.44</b> |
| 80-89 | NA                               | 9.22                            | 10.10                          | 8.4                                 | <b>9.24</b> |
|       | Chia et al,<br>2018<br>(n=2,777) | Elahi et<br>al, 1982<br>(n=186) | Elahi et<br>al, 2000<br>(n=NA) | Shikomata et<br>al, 1991<br>(n=742) |             |

**Supplementary Tables 5 (Related to Figures 8):** (A) Values of FPG in function of age range according to data reported in 4 different studies. Mean values are plotted in Figure 8A. (B) Values of FPG in function of age range and gender according to data reported in 2 different studies. Mean values are plotted in Figure 8B. (C) Values of 2h PPG after an OGTT test in function of age range according to values reported in 4 different studies. Mean values are plotted in Figure 8C. The number of participants (n) in each study is reported. In some cases, absolute values are not reported and then directly extracted from raw plots. All references are available in the manuscript or in Supplementary References.

## Supplementary References

**References Supplementary Table 1A:** (1–10)

**References Supplementary Table 1B:** (5, 11, 12)

**References Supplementary Tables 4:** (13–18)

**References Supplementary Tables 5:** (19–25)

**References Knowledge Graphs Methods:** (26–31)

**References BioExplorer Methods:** (32–38)

**References Computational Modeling Methods:** (39–44)

1. La répartition par âge des décès liés au coronavirus ressemble à une mortalité classique - Libération, [https://www.liberation.fr/direct/element/la-repartition-par-age-des-deces-lies-au-coronavirus-ressemble-a-une-mortalite-classique\\_112144/](https://www.liberation.fr/direct/element/la-repartition-par-age-des-deces-lies-au-coronavirus-ressemble-a-une-mortalite-classique_112144/)

2. • Sweden: coronavirus deaths by age | Statista, <https://www.statista.com/statistics/1107913/number-of-coronavirus-deaths-in-sweden-by-age-groups/>

3. • Spain: coronavirus mortality rate by age 2020 | Statista, <https://www.statista.com/statistics/1105596/covid-19-mortality-rate-by-age-group-in-spain-march/>

4. • South Korea: coronavirus death cases by age 2020 | Statista, <https://www.statista.com/statistics/1105080/south-korea-coronavirus-deaths-by-age/>

5. • Poland: Coronavirus (COVID-19) fatalities by age 2020 | Statista, <https://www.statista.com/statistics/1110890/poland-coronavirus-covid-19-fatalities-by-age/>

6. • Netherlands: coronavirus deaths by age 2021 | Statista, <https://www.statista.com/statistics/1109459/coronavirus-death-casualties-by-age-in-netherlands/>



7. • Italy: coronavirus death rate by age | Statista,  
<https://www.statista.com/statistics/1106372/coronavirus-death-rate-by-age-group-italy/>
8. • COVID-19 deaths by age and gender Ukraine 2020 | Statista,  
<https://www.statista.com/statistics/1109638/covid-19-deaths-by-age-and-gender-ukraine/>
9. • Coronavirus (COVID-19) deaths in Switzerland by age group 2021 | Statista,  
<https://www.statista.com/statistics/1110092/coronavirus-covid-19-deaths-age-group-switzerland/>
10. • Coronavirus (COVID-19) deaths by gender and age Germany 2021 | Statista,  
<https://www.statista.com/statistics/1105512/coronavirus-covid-19-deaths-by-gender-germany/>
11. What we know about the victims of the coronavirus pandemic in Switzerland - The Local,  
<https://www.thelocal.ch/20200409/what-we-know-about-the-victims-of-the-coronavirus-pandemic-in-switzerland>
12. M Roser; H Ritchie; E Ortiz-Ospina; J Hasell. Coronavirus Pandemic (COVID-19),  
<https://ourworldindata.org/coronavirus>
13. Y Yang; L Gao; D-J Wang; F-R Li; Y-H Yan; X-Y Wang; X Liao; Q Huang; H Zhang; Q-R Chen; Q Wang; Y Weng; M-H Song. Comparison of 25-hydroxy vitamin D3, adiponectin and apolipoprotein A5 levels in subjects with different glucose tolerance and their correlation with blood lipid. *Biomed Res* 25, 5 (2014)
14. R Tarray; S Saleem; D Afroze; I Yousuf; A Gulnar; B Laway; S Verma. Role of insulin resistance in essential hypertension. *Cardiovascular Endocrinology & Metabolism* 3, 129–133 (2014)
15. Y Mittal. Fasting Blood Glucose Level in Patients Suffering From Hypertension. *Asian Journal of Biomedical and Pharmaceutical Sciences* 4, 4 (2014)
16. Y Heianza; Y Arase; S Kodama; SD Hsieh; H Tsuji; K Saito; S Hara; H Sone. Fasting glucose and HbA1c levels as risk factors for the development of hypertension in Japanese

individuals: Toranom hospital health management center study 16 (TOPICS 16). *J Hum Hypertens* 29, 254–259 (2015)

17. P Duraisamy; S Elango; VP Vishwanandha; R Balamurugan. Prevalence of Mitochondrial tRNA Gene Mutations and Their Association with Specific Clinical Phenotypes in Patients with Type 2 Diabetes Mellitus of Coimbatore. *Genetic Testing and Molecular Biomarkers* 14, 49–55 (2010)

18. B Bhowmik; T Siddiquee; A Mujumder; T Ahmed; H Mahtab; AKA Khan; A Hussain; G Holmboe-Ottesen; TK Omsland. Diabetes Risk Score for Identifying Cardiometabolic Risk Factors in Adult Bangladeshi Population. *Journal of Diabetology* 9, 8 (2018)

19. S-W Yi; S Park; Y-H Lee; H-J Park; B Balkau; J-J Yi. Association between fasting glucose and all-cause mortality according to sex and age: a prospective cohort study. *Sci Rep* 7, 8194 (2017)

20. AP Yates; I Laing. Age-related increase in haemoglobin A1c and fasting plasma glucose is accompanied by a decrease in  $\beta$  cell function without change in insulin sensitivity: evidence from a cross-sectional study of hospital personnel. *Diabetic Medicine* 19, 254–258 (2002)

21. AI Yashin; SV Ukraintseva; KG Arbeev; I Akushevich; LS Arbeeve; AM Kulminski. Maintaining physiological state for exceptional survival: What is the normal level of blood glucose and does it change with age? *Mech Ageing Dev* 130, 611–618 (2009)

22. GT Ko; HP Wai; JS Tang. Effects of Age on Plasma Glucose Levels in Non-diabetic Hong Kong Chinese. *Croat Med J* 47, 709–713 (2006)

23. D Elahi; D Muller. Carbohydrate metabolism in the elderly. *Eur J Clin Nutr* 54, S112–S120 (2000)

24. D Elahi; DC Muller; SP Tzankoff; R Andres; JD Tobin. Effect of Age and Obesity on Fasting Levels of Glucose, Insulin, Glucagon, and Growth Hormone in Man. *Journal of Gerontology* 37, 385–391 (1982)

25. H Shimokata; DC Muller; JL Fleg; J Sorkin; AW Ziemba; R Andres. Age as independent determinant of glucose tolerance. *Diabetes* 40, 44–51 (1991)
26. JY Yen. Finding the K Shortest Loopless Paths in a Network. *Management Science* 17, 712–716 (1971)
27. M Neumann; D King; I Beltagy; W Ammar. ScispaCy: Fast and Robust Models for Biomedical Natural Language Processing. *Proceedings of the 18th BioNLP Workshop and Shared Task* 319–327 (2019)
28. J Lee; W Yoon; S Kim; D Kim; S Kim; CH So; J Kang. BioBERT: a pre-trained biomedical language representation model for biomedical text mining. *Bioinformatics* btz682 (2019)
29. G Fragoso; S de Coronado; M Haber; F Hartel; L Wright. Overview and utilization of the NCI thesaurus. *Comp Funct Genomics* 5, 648–654 (2004)
30. L Danon; J Duch; A Diaz-Guilera; A Arenas. Comparing community structure identification. *J Stat Mech* 2005, P09008–P09008 (2005)
31. G Bouma. Normalized (Pointwise) Mutual Information in Collocation Extraction. *Proceedings of the Biennial GSCL Conference 2009* (2009)
32. R Yan; Y Zhang; Y Li; L Xia; Y Guo; Q Zhou. Structural basis for the recognition of SARS-CoV-2 by full-length human ACE2. *Science* 367, 1444–1448 (2020)
33. A Watson; MJS Phipps; HW Clark; C-K Skylaris; J Madsen. Surfactant Proteins A and D: Trimerized Innate Immunity Proteins with an Affinity for Viral Fusion Proteins. *J Innate Immun* 11, 13–28 (2019)
34. Y Watanabe; JD Allen; D Wrapp; JS McLellan; M Crispin. Site-specific analysis of the SARS-CoV-2 glycan shield. *Microbiology* (2020)

35. A Shajahan; S Archer-Hartmann; NT Supekar; AS Gleinich; C Heiss; P Azadi. Comprehensive characterization of N- and O- glycosylation of SARS-CoV-2 human receptor angiotensin converting enzyme 2. *Biochemistry* (2020)
36. BW Neuman; BD Adair; C Yoshioka; JD Quispe; G Orca; P Kuhn; RA Milligan; M Yeager; MJ Buchmeier. Supramolecular Architecture of Severe Acute Respiratory Syndrome Coronavirus Revealed by Electron Cryomicroscopy. *JVI* 80, 7918–7928 (2006)
37. I-N Hsieh; X De Luna; MR White; KL Hartshorn. The Role and Molecular Mechanism of Action of Surfactant Protein D in Innate Host Defense Against Influenza A Virus. *Front Immunol* 9, 1368 (2018)
38. YM Bar-On; A Flamholz; R Phillips; R Milo. SARS-CoV-2 (COVID-19) by the numbers. *eLife* 9, e57309 (2020)
39. FP Schwarz; KD Puri; RG Bhat; A Surolia. Thermodynamics of monosaccharide binding to concanavalin A, pea (*Pisum sativum*) lectin, and lentil (*Lens culinaris*) lectin. *Journal of Biological Chemistry* 268, 7668–7677 (1993)
40. A Kussrow; E Kaltgrad; ML Wolfenden; MJ Cloninger; MG Finn; DJ Bornhop. Measurement of Monovalent and Polyvalent Carbohydrate–Lectin Binding by Back-Scattering Interferometry. *Anal Chem* 81, 4889–4897 (2009)
41. R Jolivet; JS Coggan; I Allaman; PJ Magistretti. Multi-timescale Modeling of Activity-Dependent Metabolic Coupling in the Neuron-Glia-Vasculature Ensemble. *PLoS Comput Biol* 11, e1004036 (2015)
42. MQ Gaunsbaek; KJ Rasmussen; MF Beers; EN Atochina-Vasserman; S Hansen. Lung surfactant protein D (SP-D) response and regulation during acute and chronic lung injury. *Lung* 191, 295–303 (2013)
43. Y Contreras-Baeza; PY Sandoval; R Alarcón; A Galaz; F Cortés-Molina; K Alegría; F Baeza-Lehnert; R Arce-Molina; A Guequén; CA Flores; A San Martín; LF Barros.

Monocarboxylate transporter 4 (MCT4) is a high affinity transporter capable of exporting lactate in high-lactate microenvironments. *Journal of Biological Chemistry* 294, 20135–20147 (2019)

44. S Anand. Size distribution of virus laden droplets from expiratory ejecta of infected subjects. *Scientific Reports* 9 (2020)
